# Supplementary material for: A worked bone assemblage from 120,000–90,000 year old deposits at Contrebandiers Cave, Atlantic Coast, Morocco
Source: PubMed Central journal article supplement — iScience. 2021 Sep 16;24(9):102988. doi: 10.1016/j.isci.2021.102988 (PMC8478944; doi:10.1016/j.isci.2021.102988), 2021-09-16
Supplement: mmc1.pdf [file mmc1.pdf]

**Supplemental information**

**A worked bone assemblage from 120,000–90,000 year**

**old deposits at Contrebandiers Cave,**

**Atlantic Coast, Morocco**

**Emily Y. Hallett, Curtis W. Marean, Teresa E. Steele, Esteban Álvarez-Fernández, Zenobia Jacobs, Jacopo Nicolò Cerasoni, Vera Aldeias, Eleanor M.L. Scerri, Deborah I. Olszewski, Mohamed Abdeljalil El Hajraoui, and Harold L. Dibble**

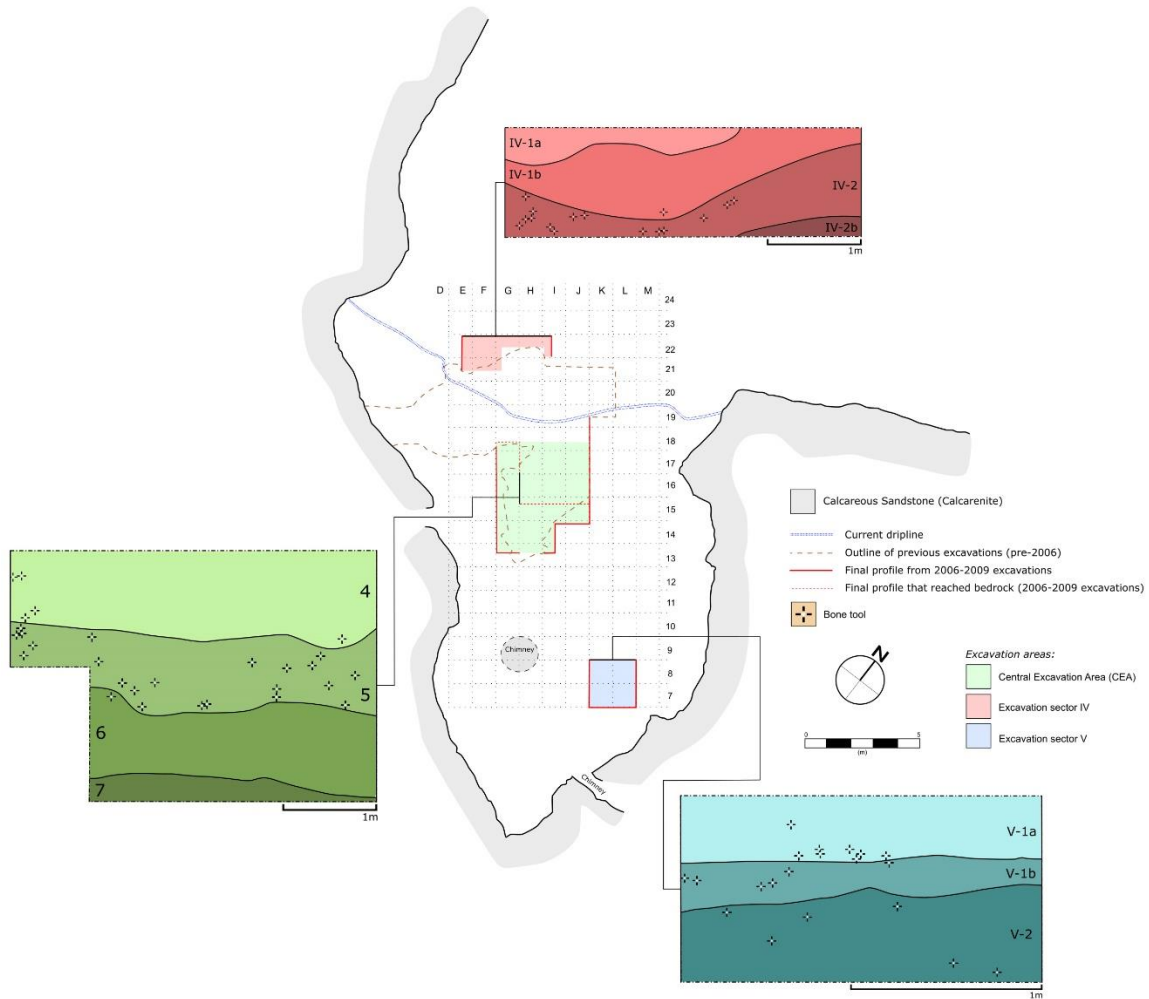

**Figure S1. Map of Contrebandiers Cave showing excavation grid with the location of the central excavation area (CEA), sector IV and sector V, related to main Figure 1 and STAR Methods. Stratigraphic profiles with total station plotted locations of bone tools and their stratigraphic level associations.**

**Table S1. Ages and their 1 $\sigma$  uncertainties reported in Jacobs et al. (2011) and Dibble et al. (Dibble et al., 2012, Dibble et al., 2013) for MSA layers from which bone tools were recovered, related to STAR Methods.**

| Sample                       | Method               | Sector | Layer | Age (ka)                     |
|------------------------------|----------------------|--------|-------|------------------------------|
| <b>ATERIAN</b>               |                      |        |       |                              |
| CONT-33                      | TL                   | IV     | IV-2  | 87 $\pm$ 11                  |
| CONT-34                      | TL                   | IV     | IV-2  | 87 $\pm$ 10                  |
| CONT-36                      | TL                   | IV     | IV-2  | 115 $\pm$ 11                 |
| CONT-37                      | TL                   | IV     | IV-2  | 80 $\pm$ 11                  |
| CONT-39                      | TL                   | IV     | IV-2  | 85 $\pm$ 11                  |
| CONT-53                      | TL                   | IV     | IV-2  | 179 $\pm$ 14                 |
| SC39                         | OSL                  | IV     | IV-2  | 96 $\pm$ 8                   |
| SC37                         | OSL                  | IV     | IV-2  | 101 $\pm$ 9                  |
| SC31                         | OSL                  | RT     | 4     | 92 $\pm$ 6                   |
| SC32                         | OSL                  | RT     | 4     | 97 $\pm$ 7                   |
| SC20                         | OSL                  | CEA    | 4D    | 104 $\pm$ 7                  |
| SC8                          | OSL                  | CEA    | 4D    | 108 $\pm$ 9                  |
| SC7                          | OSL                  | CEA    | 4D    | 117 $\pm$ 9                  |
| AT1                          | ESR (LU)<br>ESR (RU) | V      | V-1A  | 109 $\pm$ 7<br>132 $\pm$ 9   |
| PT45                         | ESR (LU)<br>ESR (RU) | V      | V-1A  | 105 $\pm$ 11<br>121 $\pm$ 14 |
| FT94                         | ESR (LU)<br>ESR (RU) | V      | V-1A  | 86 $\pm$ 2<br>108 $\pm$ 3    |
| FT95                         | ESR (LU)<br>ESR (RU) | V      | V-1A  | 94 $\pm$ 3<br>108 $\pm$ 4    |
| SC23                         | OSL                  | V      | V-1B  | 113 $\pm$ 7                  |
| SC34                         | OSL                  | V      | V-2   | 107 $\pm$ 9                  |
| <b>MAGHREBIAN MOUSTERIAN</b> |                      |        |       |                              |
| FT93                         | ESR (RU)             | CEA    | 5A    | 117 $\pm$ 18                 |
| FT83                         | ESR (RU)             | CEA    | 5A    | 123 $\pm$ 10                 |
| PT44                         | ESR (RU)             | CEA    | 5A    | 90 $\pm$ 2                   |
| CONT-5                       | TL                   | CEA    | 5A    | 89 $\pm$ 16                  |
| CONT-28                      | TL                   | CEA    | 5A    | 92 $\pm$ 14                  |
| SC16                         | OSL                  | CEA    | 5A    | 118 $\pm$ 9                  |
| FT84                         | ESR (RU)             | CEA    | 5B    | 115 $\pm$ 7                  |
| CONT-52                      | TL                   | CEA    | 5B    | 89 $\pm$ 14                  |
| SC15                         | OSL                  | CEA    | 5B    | 116 $\pm$ 8                  |
| CONT-50                      | TL                   | CEA    | 5C    | 116 $\pm$ 13                 |
| SC19                         | OSL                  | CEA    | 5C    | 124 $\pm$ 9                  |
| SC14                         | OSL                  | CEA    | 5C    | 113 $\pm$ 7                  |
| SC6                          | OSL                  | CEA    | 5C    | 114 $\pm$ 8                  |
| SC13                         | OSL                  | CEA    | 5C    | 112 $\pm$ 7                  |
| SC1                          | OSL                  | CEA    | 5C    | 115 $\pm$ 8                  |
| SC28                         | OSL                  | CEA    | 5C    | 115 $\pm$ 8                  |
| SC12                         | OSL                  | CEA    | 5C    | 119 $\pm$ 8                  |

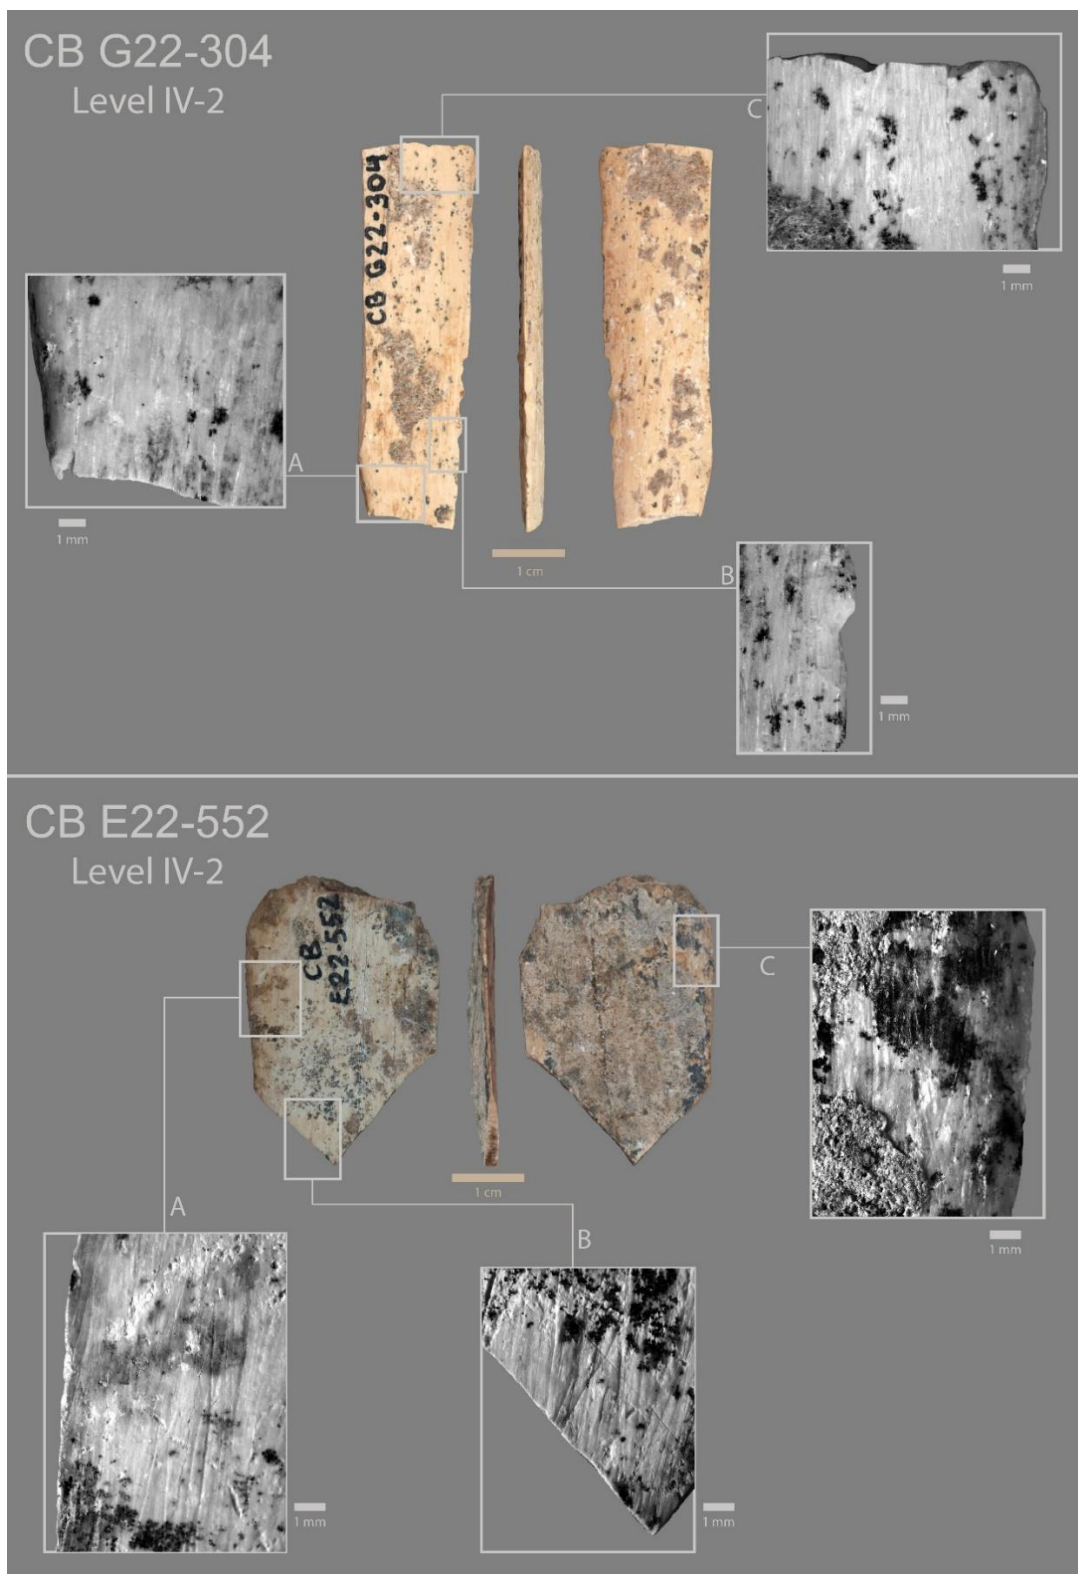

**Figure S2. Additional examples of Contrebandiers Cave spatulate tools made on rib bones, related to main Figure 2 and main Figure 3. A, B, and C on specimens CB G22-304 and CB E22-552 are microscope photographs showing manufacture marks on the edges and body of the piece, with 1 cm scale.**

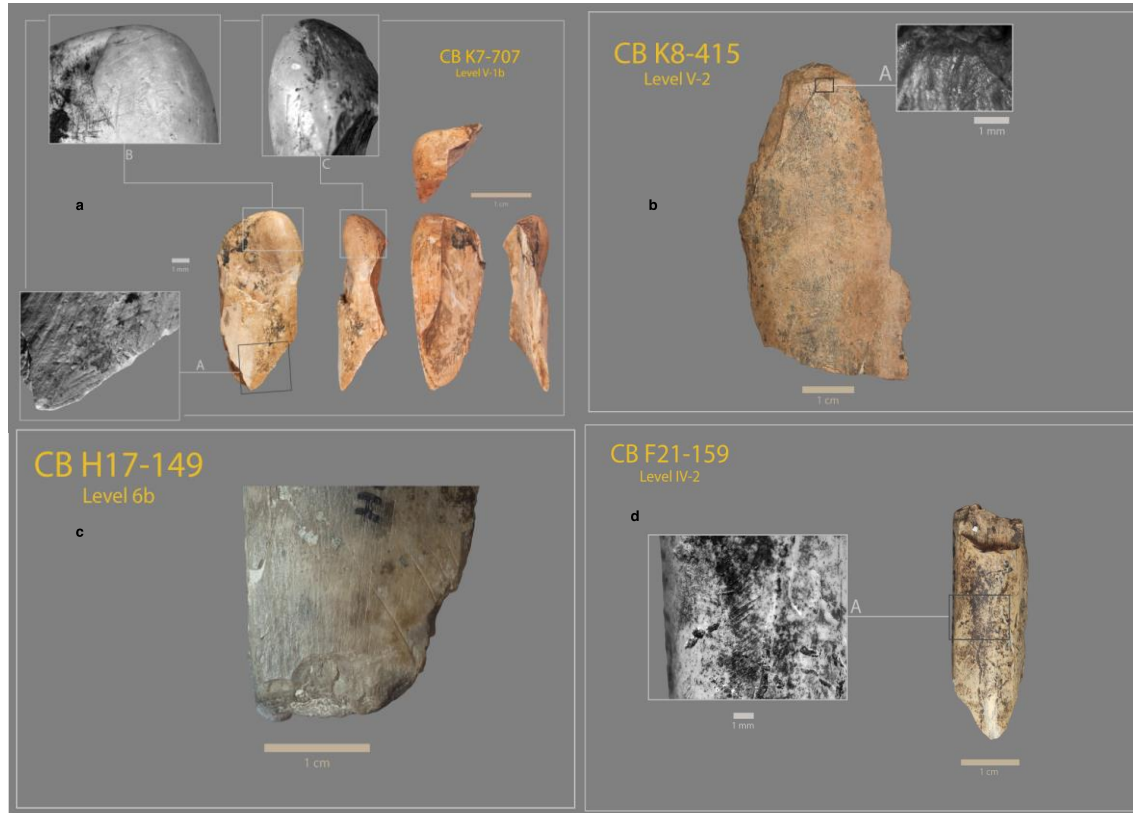

**Figure S3. Examples of other bone tool types, related to STAR Methods. (A)** K7-707, a formal piece of unknown function with polish restricted to one end. **(B)** Example of polish restricted to limited areas of an informal bone tool interpreted as resulting from use on K8-415. **(C)** H17-149 is an example of a possible pressure flaker with flake removals at tip interpreted as resulting from use. **(D)** F21-159 is an example of a possible “snapped-tipped” piece.

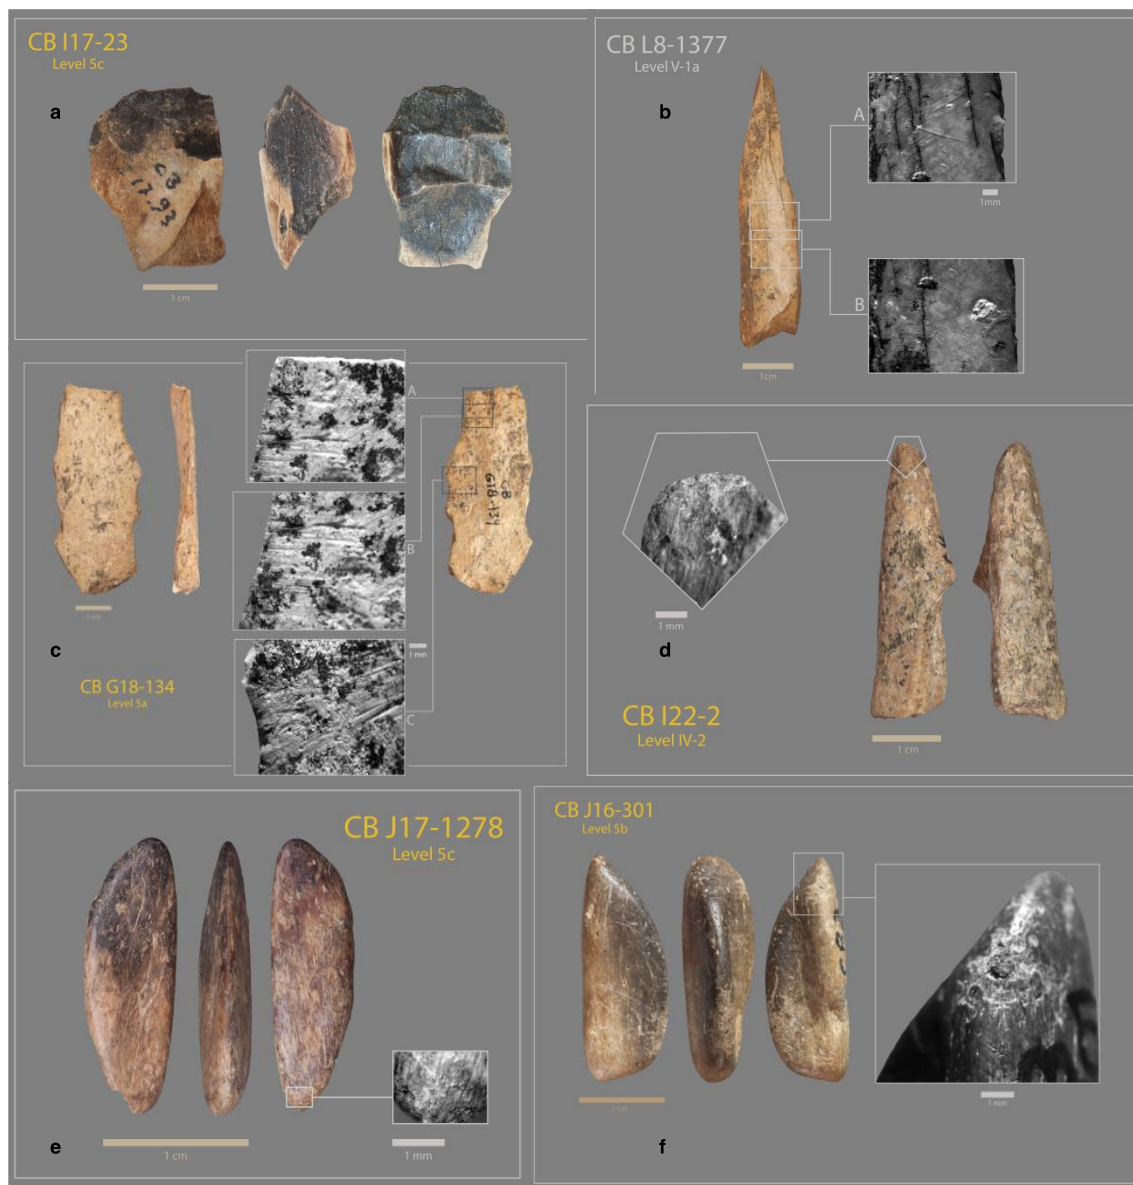

**Figure S4. Examples of other formal and informal tool types, related to STAR Methods. (A)** I17-23 is an example of a scaled piece shaped by flake removal using percussion. **(B)** L8-1377 is a formal tool that does not conform to a known type but resembles an awl. **(C)** G18-134 is an example of a formal bone tool that does not conform to a known type. **(D)** I22-2 is an example of a formal bone tool that does not conform to a known type. **(E)** J17-1278 is an example of a likely informal bone tool with smoothing and polish that does not conform to a known type. **(F)** J16-301 is an example of a likely informal bone tool with smoothing and polish that does not conform to a known type.

**Table S2. Bone tool unique specimen identification numbers (Square IDs) showing bone tool type, burning extent, length (mm), width (mm), thickness (mm), archaeological layer, and xyz provenience (meters), related to STAR Methods.**

| Square ID | Tool Type          | Burning  | Length | Width | Thickness | Layer | X     | Y      | Z      |
|-----------|--------------------|----------|--------|-------|-----------|-------|-------|--------|--------|
| E21-105   | spatulate          | tip only | 91.08  | 33.58 | 9.04      | IV-2  | 5.524 | 21.818 | -1.812 |
| E21-81    | unknown            | none     | 67.39  | 18.43 | 9.38      | IV-2  | 5.626 | 21.986 | -1.74  |
| E22-143   | unknown            | none     | 67.08  | 20.04 | 9.92      | IV-2  | 5.694 | 22.249 | -1.643 |
| E22-182   | unknown            | none     | 51.72  | 20.45 | 7.89      | IV-2  | 5.662 | 22.034 | -1.729 |
| E22-552   | spatulate          | none     | 38.52  | 27.19 | 2.97      | IV-2  | 5.89  | 22.457 | -1.848 |
| E22-561   | spatulate          | none     | 30.15  | 19.18 | 2.74      | IV-2  | 5.914 | 22.45  | -1.858 |
| E22-717   | unknown            | partial  | 31.4   | 20.47 | 6.75      | IV-2  | 5.618 | 22.835 | -1.481 |
| F21-194   | unknown            | none     | 19.85  | 10.64 | 5.83      | IV-2  | 6.135 | 21.967 | -1.707 |
| F21-48    | unknown            | none     | 41.4   | 17.65 | 12.23     | IV-2  | 6.253 | 21.933 | -1.698 |
| G13-165   | retoucher          | complete | 38.81  | 25.47 | 10.63     | 4     | 7.251 | 13.897 | -1.952 |
| G14-1201  | unknown            | none     | 21.85  | 8.7   | 4.23      | 4     | 7.272 | 14.663 | -1.559 |
| G14-19    | unknown            | partial  | 101.45 | 26.9  | 16.94     | 4     | 7.017 | 14.847 | -1.179 |
| G15-60    | unshaped split rib | none     | 75     | 30.06 | 6.78      | 4     | 7.168 | 15.598 | -1.636 |
| G17-217   | unknown            | none     | 38.19  | 18.4  | 7.91      | 5C    | 7.145 | 17.658 | -2.071 |
| G17-264   | unknown            | tip only | 23.46  | 7.63  | 5.4       | 5A    | 7.117 | 17.41  | -1.814 |
| G17-70    | unknown            | none     | 27.91  | 11.57 | 6.53      | 5A    | 7.121 | 17.326 | -1.766 |
| G17-88    | retoucher          | none     | 73.69  | 38.42 | 16.35     | 5A    | 7.08  | 17.348 | -1.834 |
| G18-134   | unknown            | none     | 57.44  | 23.84 | 6.27      | 5A    | 7.898 | 18.473 | -1.86  |
| G22-303   | spatulate          | none     | 70.39  | 23.39 | 4.56      | IV-2  | 7.079 | 22.627 | -1.881 |
| G22-304   | spatulate          | none     | 52.48  | 15.6  | 2.87      | IV-2  | 7.548 | 22.535 | -1.725 |
| G22-312   | spatulate          | none     | 63.94  | 24.64 | 4.05      | IV-2  | 7.099 | 22.624 | -1.873 |
| G22-582   | spatulate          | none     | 108.57 | 23.85 | 7.53      | IV-2  | 7.809 | 22.949 | -1.572 |
| H17-123   | unknown            | complete | 23.91  | 8.7   | 5.4       | 5C    | 8.369 | 17.914 | -2.461 |
| H17-149   | pressure flaker    | partial  | 41.17  | 22.34 | 8         | 6B    | 8.134 | 17.968 | -2.518 |
| H17-470   | unknown            | partial  | 20.6   | 18.05 | 11.58     | 5C    | 7.974 | 17.841 | -2.14  |
| H17-474   | unknown            | none     | 99.99  | 44.69 | 20.71     | 5D    | 8.453 | 17.741 | -2.652 |
| H17-573   | unknown            | partial  | 26.29  | 16.53 | 4.86      | 5C    | 8.232 | 17.849 | -2.377 |
| H17-65    | unknown            | none     | 29.3   | 12.62 | 8.04      | 4     | 8.07  | 17.784 | -1.697 |
| H18-144   | unknown            | partial  | 21.21  | 14.95 | 4.66      | 5C    | 8.59  | 18.123 | -2.378 |
| I16-22    | unknown            | none     | 38.44  | 19.32 | 6.09      | 5B    | 9.663 | 16.603 | -2.141 |
| I16-247   | retoucher          | partial  | 21.45  | 20.08 | 4.75      | 5C    | 9.931 | 16.387 | -2.45  |

|          |                    |          |       |       |       |      |        |        |        |
|----------|--------------------|----------|-------|-------|-------|------|--------|--------|--------|
| I16-531  | unknown            | tip only | 63.53 | 22.82 | 5.86  | 5C   | 9.125  | 16.237 | -2.634 |
| I17-23   | scaled piece       | partial  | 24.24 | 17.78 | 12.76 | 5C   | 9.928  | 17.22  | -2.542 |
| I22-2    | unknown            | none     | 39.13 | 13.57 | 8.95  | IV-2 | 9.138  | 22.671 | -1.138 |
| J16-301  | smooth unknown     | tip only | 25.46 | 9.63  | 7.52  | 5B   | 10.41  | 16.346 | -2.07  |
| J16-441  | retoucher          | complete | 34.25 | 18.1  | 5.97  | 5C   | 10.791 | 16.644 | -2.302 |
| J16-476  | smooth unknown     | complete | 29.13 | 10.69 | 4.76  | 5C   | 10.044 | 16.182 | -2.219 |
| J16-52   | unknown            | none     | 55.05 | 24.05 | 10.71 | 4    | 10.66  | 16.862 | -1.907 |
| J17-1278 | smooth unknown     | tip only | 18.5  | 5.94  | 3.61  | 5C   | 10.5   | 17.961 | -2.408 |
| J17-398  | retoucher          | none     | 95    | 15.61 | 8.84  | 5A   | 10.886 | 17.93  | -2.104 |
| J19-10   | unknown            | complete | 24.77 | 11.12 | 9.39  | 5C   | 10.685 | 19.051 | -2.67  |
| K7-108   | unknown            | none     | 49.61 | 11    | 4.66  | V-1B | 11.846 | 7.078  | -1.381 |
| K7-215   | retoucher          | none     | 58.23 | 17.8  | 9.41  | V-1B | 11.542 | 7.356  | -1.575 |
| K7-246   | unknown            | none     | 38.71 | 11.78 | 10.93 | V-1B | 11.054 | 7.352  | -1.418 |
| K7-317   | retoucher          | none     | 37.01 | 13.6  | 5.62  | V-2  | 11.361 | 7.836  | -1.712 |
| K7-707   | unknown            | none     | 29.31 | 14.11 | 7.75  | V-1B | 11.595 | 7.315  | -1.556 |
| K8-132   | retoucher          | none     | 46.41 | 14.63 | 4.82  | V-1A | 11.847 | 8.836  | -1.394 |
| K8-133   | retoucher          | none     | 38.65 | 30.63 | 12.46 | V-1A | 11.734 | 8.886  | -1.416 |
| K8-148   | unknown            | none     | 81.47 | 14.97 | 5.13  | V-1A | 11.996 | 8.852  | -1.373 |
| K8-1641  | pressure flaker    | none     | 42.16 | 19.04 | 17.94 | V-1B | 11.684 | 8.717  | -1.497 |
| K8-246   | retoucher          | none     | 43.45 | 22.5  | 6.76  | V-1B | 11.203 | 8.655  | -1.538 |
| K8-249   | unknown            | none     | 57.84 | 12.78 | 9.77  | V-1B | 11.14  | 8.69   | -1.529 |
| K8-415   | pressure flaker    | none     | 59.59 | 30.92 | 8.33  | V-2  | 11.781 | 8.353  | -1.734 |
| K8-43    | unknown            | none     | 53.46 | 18.4  | 8.34  | V-1A | 11.693 | 8.799  | -1.244 |
| K8-565   | retoucher          | none     | 38.25 | 16.36 | 6.95  | V-2  | 11.593 | 8.421  | -1.864 |
| L7-226   | unknown            | none     | 64.31 | 19.6  | 7.75  | V-1B | 12.036 | 7.129  | -1.426 |
| L7-519   | unknown            | tip only | 58.37 | 15.15 | 8.17  | V-2  | 12.894 | 7.944  | -2.086 |
| L7-983   | unknown            | none     | 52.99 | 29.05 | 11.04 | V-2  | 12.247 | 7.18   | -1.679 |
| L8-1203  | retoucher          | none     | 49.75 | 17    | 7.2   | V-1B | 12.176 | 8.734  | -1.588 |
| L8-1377  | unknown            | none     | 55.01 | 12.07 | 4.41  | V-1A | 12.206 | 8.419  | -1.49  |
| L8-704   | retoucher          | complete | 18.21 | 15.48 | 61.53 | V-2  | 12.537 | 8.186  | -1.985 |
| L8-754   | unshaped split rib | none     | 60.44 | 28.38 | 4.81  | V-2  | 12.13  | 8.708  | -2.275 |



**Table S3. The provenience of carnivore bones bearing skinning marks, related to main Figure 5 and STAR Methods.** Unique specimen identification numbers (Square IDs) showing skeletal element, skeletal element description, taxonomic Class, taxonomic Order, taxonomic Family, Genus and species, skeletal element side, archaeological layer, and xyz provenience (meters). Where U= unidentifiable, L= left, and R=right.

| Square ID | Skeletal element | Description        | Class    | Order     | Family  | Genus species            | Side | Layer | X      | Y      | Z      |
|-----------|------------------|--------------------|----------|-----------|---------|--------------------------|------|-------|--------|--------|--------|
| G22-101   | mandible         | body               | Mammalia | Carnivora | Canidae | <i>Vulpes rueppellii</i> | L    | IV-2  | 7.211  | 22.161 | -1.764 |
| J19-251*  | tibia            | shaft              | Mammalia | Carnivora | Canidae | <i>Vulpes rueppellii</i> | L    | 7     | 10.767 | 19.538 | -3.777 |
| J19-377*  | tibia            | shaft              | Mammalia | Carnivora | Canidae | <i>Vulpes rueppellii</i> | L    | 7     | 10.799 | 19.594 | -3.784 |
| K7-382    | mandible         | body               | Mammalia | Carnivora | Canidae | <i>Vulpes rueppellii</i> | L    | V-1B  | 11.351 | 7.25   | -1.731 |
| K8-337    | mandible         | other              | Mammalia | Carnivora | Canidae | <i>Vulpes rueppellii</i> | R    | V-2   | 11.944 | 8.461  | -1.697 |
| L7-503    | mandible         | body               | Mammalia | Carnivora | Canidae | <i>Vulpes rueppellii</i> | R    | V-2   | 12.792 | 7.876  | -1.877 |
| L7-659    | mandible         | body               | Mammalia | Carnivora | Canidae | <i>Vulpes rueppellii</i> | U    | V-2   | 12.634 | 7.359  | -1.532 |
| L7-923    | mandible         | other              | Mammalia | Carnivora | Canidae | <i>Vulpes rueppellii</i> | U    | V-1B  | 12.577 | 7.3    | -1.439 |
| G14-918   | proximal phalanx | proximal epiphysis | Mammalia | Carnivora | Canidae | <i>Vulpes rueppellii</i> | U    | 4     | 7.774  | 14.054 | -1.81  |
| K7-892    | radius           | shaft              | Mammalia | Carnivora | Canidae | <i>Vulpes rueppellii</i> | U    | V-2   | 11.647 | 7.911  | -1.94  |
| G13-193   | proximal phalanx | complete           | Mammalia | Carnivora | Canidae | <i>Vulpes rueppellii</i> | U    | 4     | 7.189  | 13.984 | -1.082 |
| K8-425    | mandible         | shaft              | Mammalia | Carnivora | Canidae | <i>Vulpes rueppellii</i> | R    | V-2   | 11.794 | 8.403  | -1.795 |
| K8-910    | ulna             | distal epiphysis   | Mammalia | Carnivora | Canidae | <i>Canis aureus</i>      | R    | V-2   | 11.504 | 8.563  | -1.835 |
| K7-705    | metapodial       | proximal epiphysis | Mammalia | Carnivora | Canidae | <i>Canis aureus</i>      | U    | V-1B  | 11.595 | 7.315  | -1.556 |
| K8-215    | mandible         | body               | Mammalia | Carnivora | Felidae | <i>Felis silvestris</i>  | R    | V-1B  | 11.303 | 8.585  | -1.455 |
| L7-833    | proximal phalanx | complete           | Mammalia | Carnivora | Felidae | <i>Felis silvestris</i>  | U    | V-1A  | 12.52  | 7.74   | -1.268 |

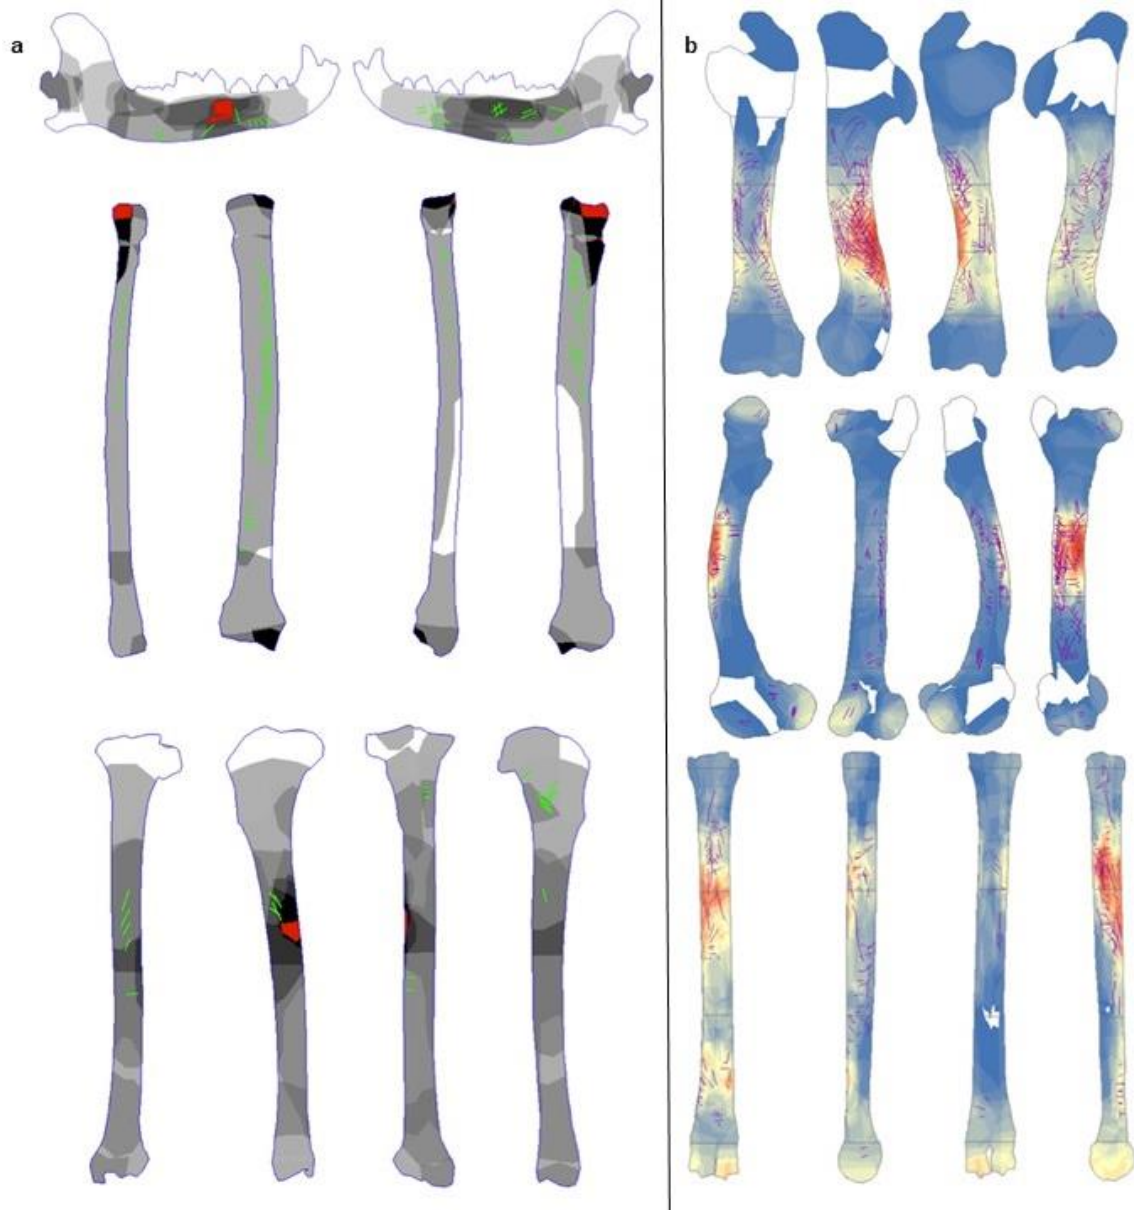

**Figure S5. Distributions of cut marks on (A) carnivore (green lines represent cut marks) and (B) bovid (purple lines represent cut marks) bones, related to main Figure 5 and STAR Methods.**

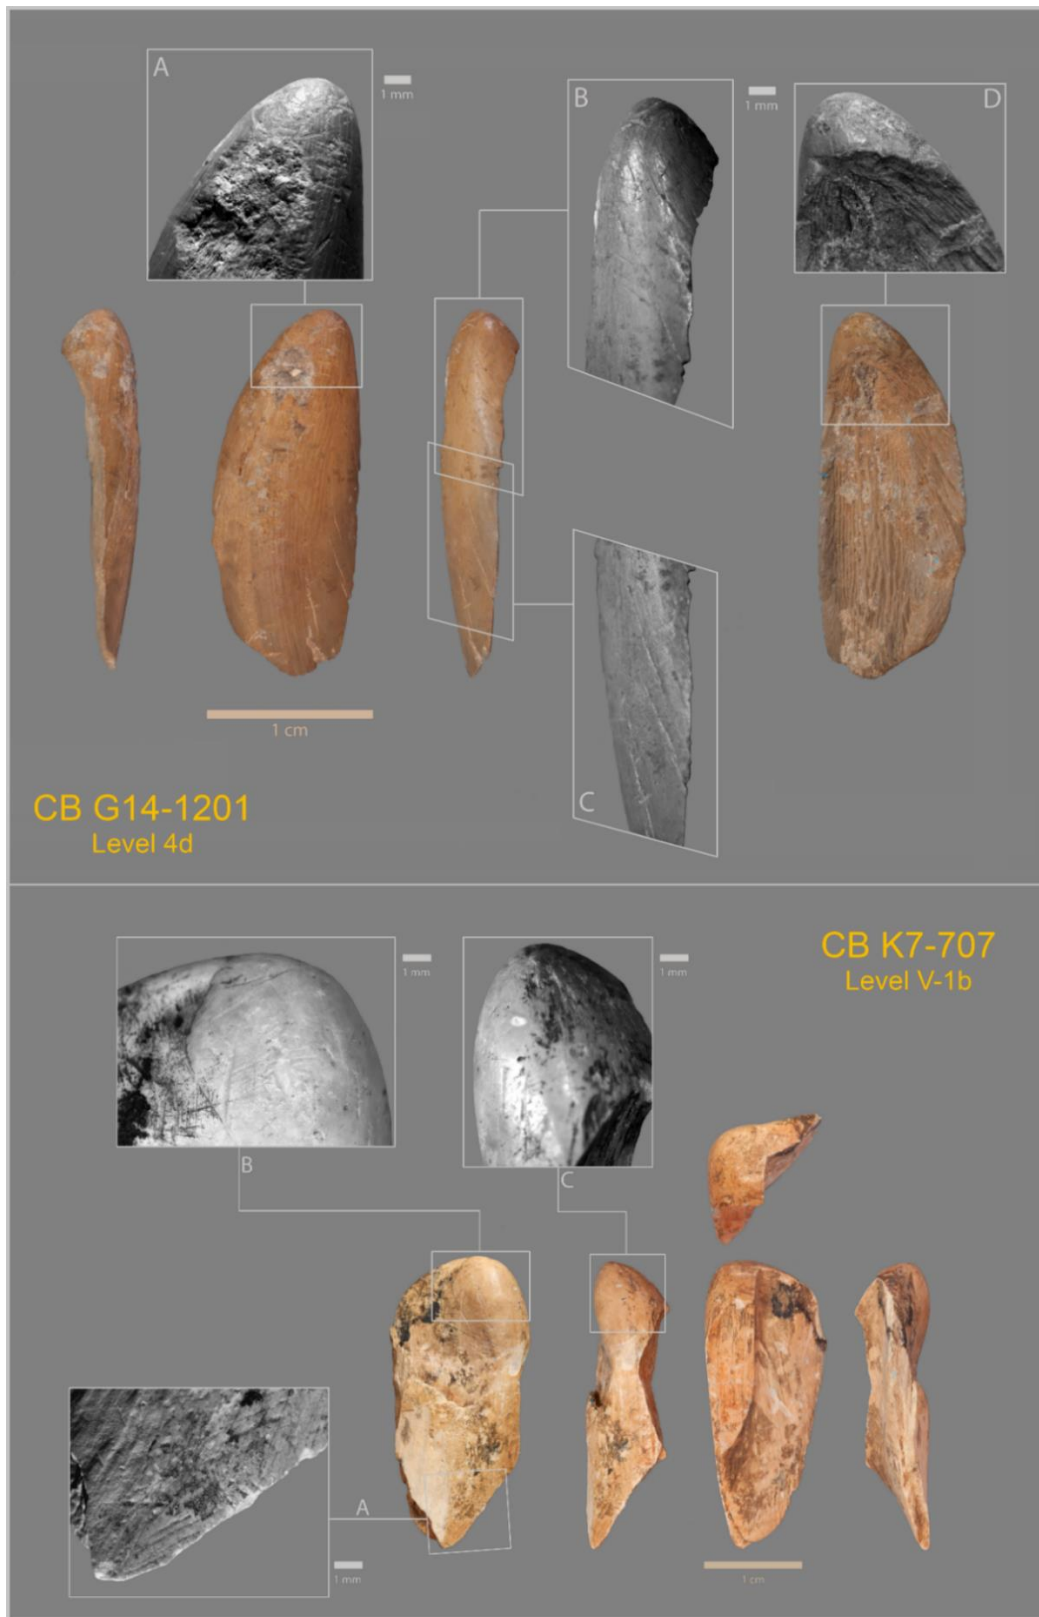

**Figure S6. Shaped bone tools that do not conform to a yet-known type, related to STAR Methods.** A, B, and C on specimens CB G14-1201 and CB K7-707 are microscope photographs with 1 cm scale.

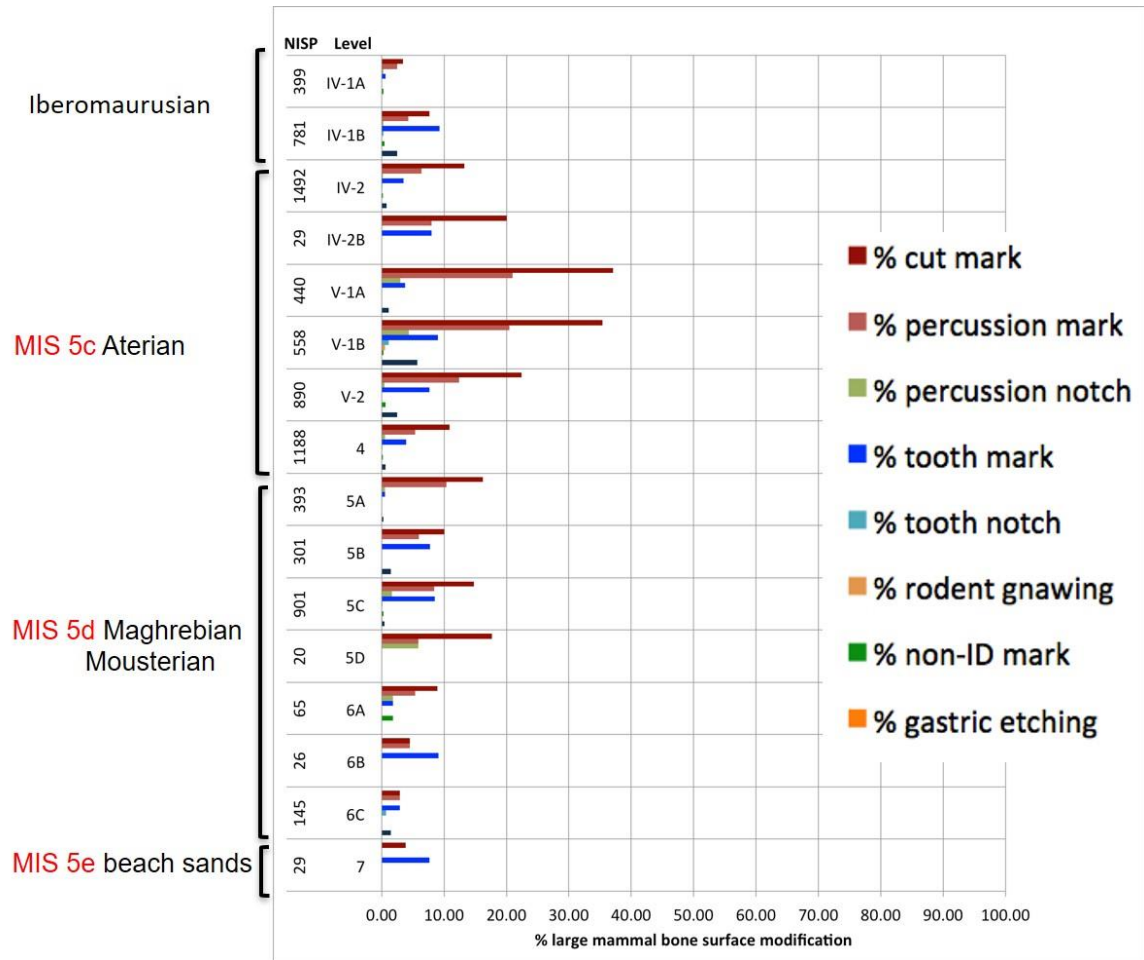

Figure S7. Surface modification of large mammal bones (N = 6,603) in CEA, sector IV and sector V, related to STAR Methods.

**Table S4. Bone tool unique specimen identification numbers (Square IDs) showing skeletal element, skeletal element description, taxonomic Class, taxonomic Order, taxonomic Family, Genus and species, skeletal element side, and body size class, related to STAR Methods. Where U= unidentifiable, L= left, and R=right.**

| Square ID | Skeletal Element | Description | Class    | Order        | Family  | Genus species | Side | Body size |
|-----------|------------------|-------------|----------|--------------|---------|---------------|------|-----------|
| E21-105   | long bone        | shaft       | Mammalia | U            | U       | U             | U    | U         |
| E21-81    | tibia            | shaft       | Mammalia | U            | U       | U             | U    | 2b/3a     |
| E22-143   | radius           | shaft       | Mammalia | Artiodactyla | Bovidae | U             | L    | 3         |
| E22-182   | femur            | shaft       | Mammalia | Artiodactyla | Bovidae | U             | U    | 1b/2a     |
| E22-552   | U                | other       | Mammalia | U            | U       | U             | U    | U         |
| E22-561   | U                | other       | Mammalia | U            | U       | U             | U    | U         |
| E22-717   | femur            | shaft       | Mammalia | Artiodactyla | Bovidae | U             | U    | 2         |
| F21-194   | U                | other       | Mammalia | U            | U       | U             | U    | U         |
| F21-48    | long bone        | shaft       | Mammalia | U            | U       | U             | U    | U         |
| G13-165   | long bone        | shaft       | Mammalia | Artiodactyla | Bovidae | U             | U    | 3         |
| G14-1201  | U                | other       | Mammalia | U            | U       | U             | U    | U         |
| G14-19    | metapodial       | shaft       | Mammalia | Artiodactyla | Bovidae | U             | U    | 3b/4a     |
| G15-60    | rib              | shaft       | Mammalia | U            | U       | U             | U    | 3b/4a     |
| G17-217   | radius           | shaft       | Mammalia | Artiodactyla | U       | U             | U    | 2         |
| G17-264   | U                | other       | Mammalia | U            | U       | U             | U    | U         |
| G17-70    | U                | other       | Mammalia | U            | U       | U             | U    | U         |
| G17-88    | femur            | shaft       | Mammalia | Artiodactyla | Bovidae | U             | U    | 4         |
| G18-134   | U                | other       | Mammalia | U            | U       | U             | U    | U         |
| G22-303   | rib              | shaft       | Mammalia | U            | U       | U             | U    | U         |
| G22-304   | rib              | shaft       | Mammalia | U            | U       | U             | U    | U         |
| G22-312   | U                | other       | Mammalia | U            | U       | U             | U    | U         |
| G22-582   | rib              | shaft       | Mammalia | U            | U       | U             | U    | U         |
| H17-123   | U                | other       | Mammalia | U            | U       | U             | U    | U         |
| H17-149   | femur            | shaft       | Mammalia | U            | U       | U             | U    | 3         |
| H17-470   | long bone        | epiphysis   | Mammalia | U            | U       | U             | U    | 2         |
| H17-474   | radius           | shaft       | Mammalia | U            | U       | U             | U    | 5         |
| H17-573   | long bone        | shaft       | Mammalia | U            | U       | U             | U    | 2         |
| H17-65    | long bone        | shaft       | Mammalia | U            | U       | U             | U    | U         |
| H18-144   | U                | other       | Mammalia | U            | U       | U             | U    | U         |

|          |            |       |          |              |                 |                                  |   |       |
|----------|------------|-------|----------|--------------|-----------------|----------------------------------|---|-------|
| I16-22   | radius     | shaft | Mammalia | Artiodactyla | Bovidae         | U                                | U | 3     |
| I16-247  | long bone  | shaft | Mammalia | U            | U               | U                                | U | 2b/3a |
| I16-531  | femur      | shaft | Mammalia | Artiodactyla | U               | U                                | U | 3     |
| I17-23   | long bone  | shaft | Mammalia | Artiodactyla | Bovidae         | U                                | U | 2     |
| I22-2    | long bone  | shaft | Mammalia | U            | U               | U                                | U | 2     |
| J16-301  | long bone  | shaft | Mammalia | U            | U               | U                                | U | 1b/2a |
| J16-441  | long bone  | shaft | Mammalia | Artiodactyla | Bovidae         | U                                | U | 2b/3a |
| J16-476  | long bone  | shaft | Mammalia | U            | U               | U                                | U | 1b/2a |
| J16-52   | long bone  | shaft | Mammalia | U            | U               | U                                | U | 3     |
| J17-1278 | U          | other | Mammalia | U            | U               | U                                | U | 1     |
| J17-398  | radius     | shaft | Mammalia | Artiodactyla | Bovidae         | <i>Gazella</i> sp.               | U | 2a    |
| J19-10   | U          | other | Mammalia | U            | U               | U                                | U | U     |
| K7-108   | metapodial | shaft | Mammalia | Artiodactyla | Bovidae         | <i>Gazella</i> sp.               | U | 1b/2a |
| K7-215   | radius     | shaft | Mammalia | Artiodactyla | Bovidae         | U                                | R | 3a    |
| K7-246   | long bone  | shaft | Mammalia | U            | U               | U                                | U | U     |
| K7-317   | tibia      | shaft | Mammalia | Artiodactyla | Bovidae         | U                                | R | 1b/2a |
| K7-707   | long bone  | shaft | Mammalia | U            | U               | U                                | U | 1b/2a |
| K8-132   | metapodial | shaft | Mammalia | Artiodactyla | Bovidae         | U                                | U | 2b    |
| K8-133   | humerus    | shaft | Mammalia | Artiodactyla | Bovidae         | U                                | U | 4a    |
| K8-148   | metapodial | shaft | Mammalia | Artiodactyla | Bovidae         | U                                | U | 2b    |
| K8-1641  | mandible   | tooth | Mammalia | Cetacea      | Physeteridae(?) | <i>Physeter macrocephalus(?)</i> | U | 6     |
| K8-246   | humerus    | shaft | Mammalia | Artiodactyla | U               | U                                | U | 3b    |
| K8-249   | metapodial | shaft | Mammalia | Artiodactyla | Bovidae         | <i>Gazella</i> sp.               | U | 2b    |
| K8-415   | femur      | shaft | Mammalia | Artiodactyla | Bovidae         | U                                | U | 4b    |
| K8-43    | femur      | shaft | Mammalia | Artiodactyla | U               | U                                | U | 2b    |
| K8-565   | humerus    | shaft | Mammalia | Artiodactyla | U               | U                                | U | 1b    |
| L7-226   | tibia      | shaft | Mammalia | Artiodactyla | Bovidae         | <i>Gazella</i> sp.               | L | 2b    |
| L7-519   | femur      | shaft | Mammalia | Artiodactyla | Bovidae         | <i>Gazella</i> sp.               | U | 2a    |
| L7-983   | humerus    | shaft | Mammalia | Artiodactyla | Bovidae         | <i>Bos primigenius</i>           | U | 5     |
| L8-1203  | humerus    | shaft | Mammalia | Artiodactyla | Bovidae         | U                                | U | 3     |
| L8-1377  | humerus    | shaft | Mammalia | Artiodactyla | Bovidae         | <i>Gazella</i> sp.               | L | 2a    |
| L8-704   | mandible   | tooth | Mammalia | Artiodactyla | Suidae          | U                                | L | 3     |
| L8-754   | rib        | shaft | Mammalia | Artiodactyla | Bovidae         | <i>Bos primigenius</i>           | U | 5     |

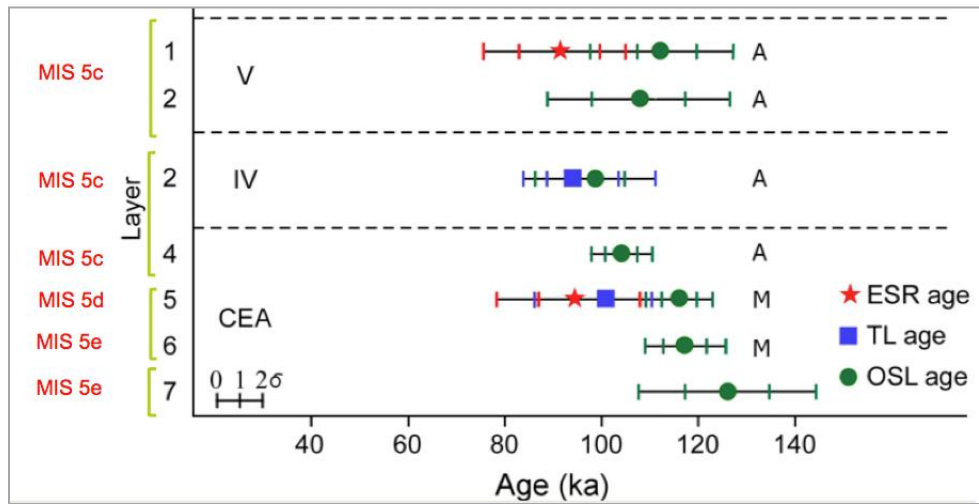

**Figure S8. Weighted mean ages for MSA layers at Contrebandiers Cave derived from three independent dating techniques, related to STAR Methods.** 'A' represents the so-called Aterian and 'M' represents the so-called Maghrebian Mousterian stone tool industries. Figure modified from Dibble et al. (2012).

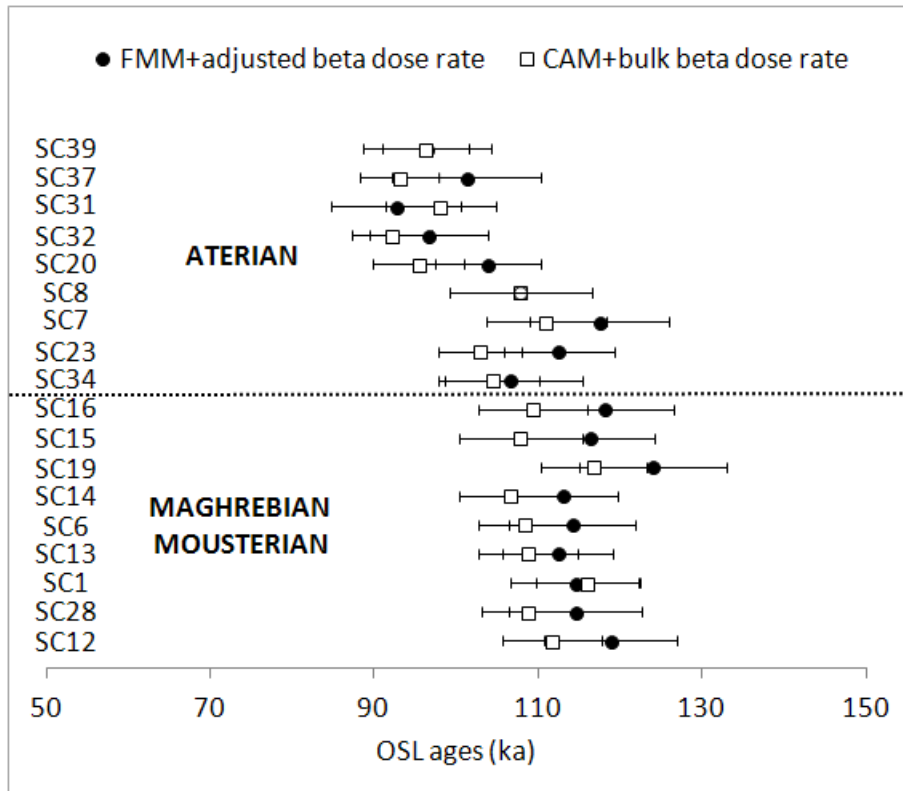

Figure S9. Comparison of ages for the samples collected from layers in which bone tools were found with (filled circles) and without (open squares) the beta dose correction method of Jacobs et al. (2011), related to STAR Methods.
